# Supplementary material for: Virus inactivation in stored human urine, sludge and animal manure under typical conditions of storage or mesophilic anaerobic digestion
Source: PubMed Central journal article supplement (PMC7705124; doi:10.1039/c6ew00311g), 2017-03-17
Supplement: ESWRT-03-492-s001.pdf [file ESWRT-03-492-s001.pdf]

**Supplementary material  
for**

**Virus inactivation in stored human urine, sludge and animal manure under  
typical conditions of storage or mesophilic anaerobic digestion**

Loïc Decrey<sup>a</sup> and Tamar Kohn<sup>a\*</sup>

*<sup>a</sup>Laboratory of Environmental Chemistry, School of Architecture, Civil and Environmental Engineering  
(ENAC), École Polytechnique Fédérale de Lausanne (EPFL), CH-1015 Lausanne, Switzerland*

\*Corresponding author

phone: +41 (0)21 693 0891; fax: +41 (0)21 693 8070;

e-mail: tamar.kohn@epfl.ch

### Determination of pKa (as a function of T)

- For all species (except phosphate) (according to PHREEQC empirical pKa determination)

$$\log_{10}K_a = A_1 + A_2T + \frac{A_3}{T} + A_4\log_{10}T + \frac{A_5}{T^2} \quad (S1)$$

With:

|        | A1       | A2       | A3       | A4       | A5       |
|--------|----------|----------|----------|----------|----------|
| CO3 2- | 107.8975 | 0.032528 | -5151.79 | -38.9256 | 563713.9 |
| HCO3 - | 356.3094 | 0.06092  | -21834.4 | -126.834 | 1684915  |
| NH3    | 0.6322   | -0.00123 | -2835.76 | 0        | 0        |
| Kw     | -283.971 | -0.0507  | 13323    | 102.2445 | -1119669 |

And for OH<sup>-</sup> ( $K_a = [\text{OH}][\text{H}]/[\text{H}_2\text{O}] = K_w/55.5$ ):  $pK_a(T) = -\log_{10}\left(\frac{K_w(T)}{55.5}\right)$

- For phosphate (Van't Hoff equation):

$$pK_{a2} = -\log_{10}\left(10^{-pK_{a1}} \exp\left(\frac{-\Delta H}{R}\left(\frac{1}{T_2} - \frac{1}{T_1}\right)\right)\right) \quad (S2)$$

With:

$\Delta H_r$  (standard enthalpy of reaction) at 25°C:

|            |                           |
|------------|---------------------------|
| PO4/HPO4   | -14.7 kJ/mol <sup>1</sup> |
| HPO4/H2PO4 | -4.2 kJ/mol               |

And  $\Delta H_r = \Delta H_f(\text{product}) - \Delta H_f(\text{reactant})$  (from online handbook of chemistry and physics):

|       |                |
|-------|----------------|
| PO4   | -1277.4 kJ/mol |
| HPO4  | -1292.1 kJ/mol |
| H2PO4 | -1296.3 kJ/mol |

<sup>1</sup> Confirmed by PHREEQC database (phreeqc.dat) -3.53 kcal/mol = -14.7 kJ/mol

Scheme S1: Illustration of experimental protocol

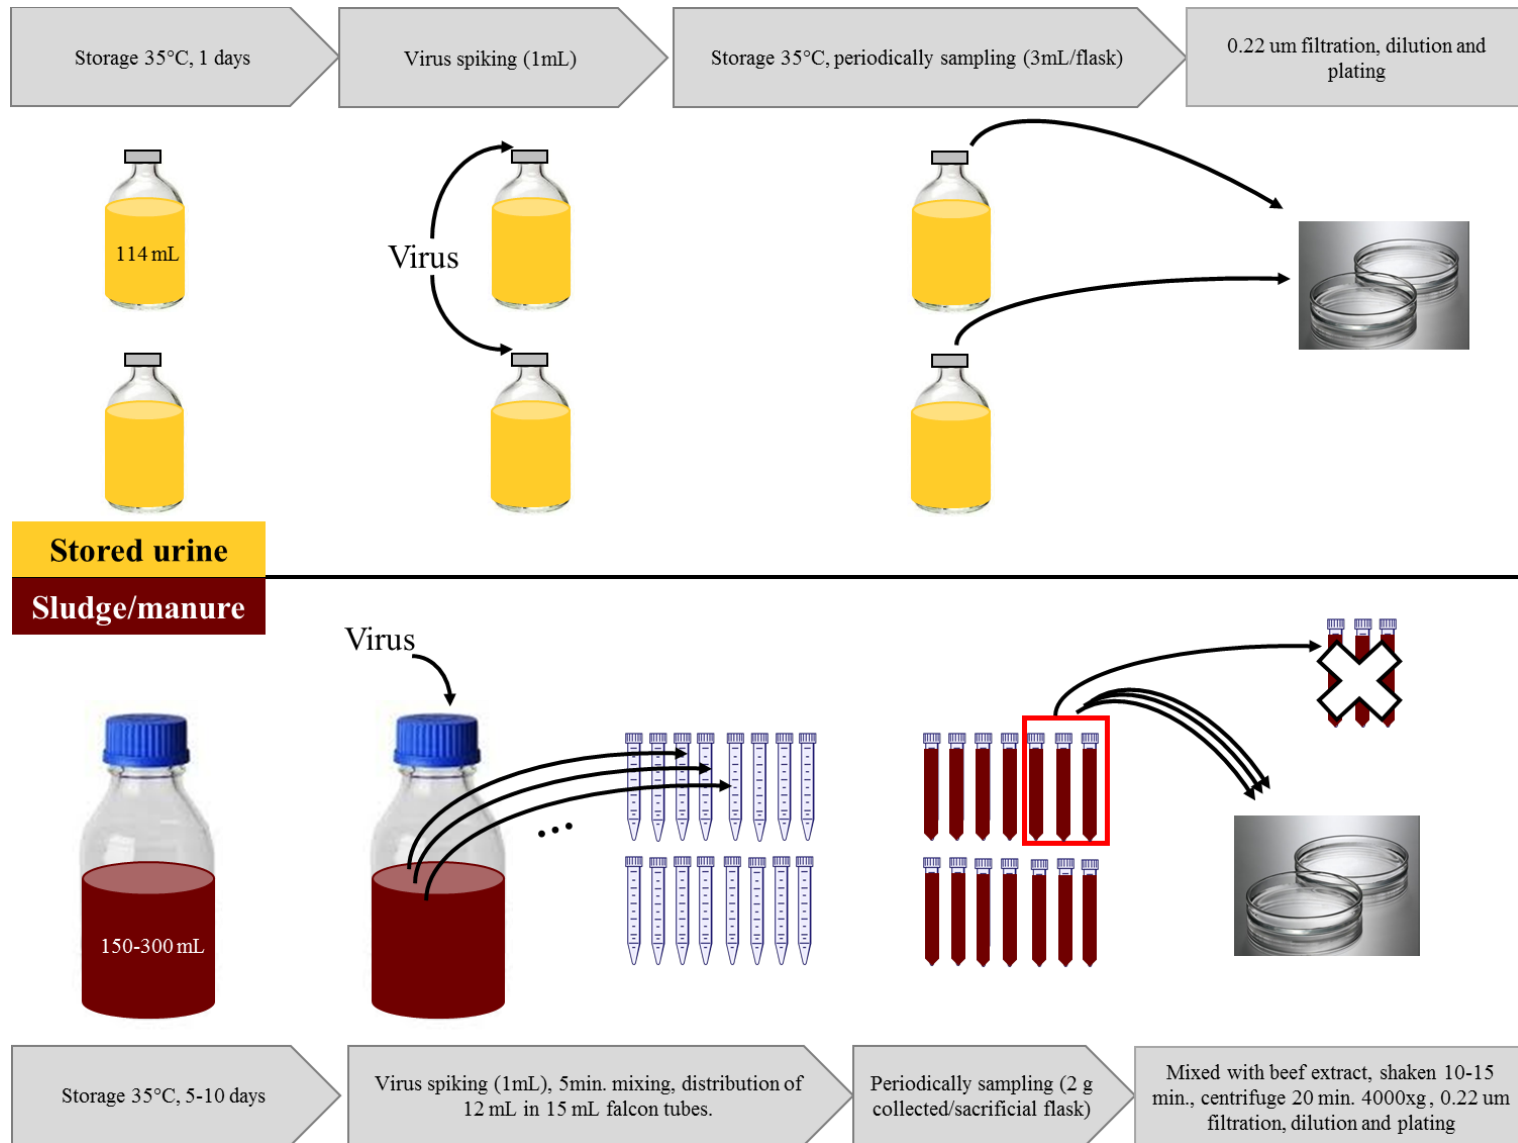

**Table S1: Composition of matrixes used in this study. For those matrixes analyzed at the beginning and end of an experiment, the average values are listed. 95% CI indicates the 95% confidence interval of three (sludge and manure) or four (urine) replicate measurements. SCOD = soluble chemical oxygen demand; TAN = total ammonium nitrogen; TIC = total inorganic carbon.**

| ID  | Sample description |                | Ca   |              | Cl    |        | SCOD                  |        | K    |        | Mg    |              | Na   |        | TAN   |        | PO <sub>4</sub> |        | TIC   |        | SO <sub>4</sub> |        |
|-----|--------------------|----------------|------|--------------|-------|--------|-----------------------|--------|------|--------|-------|--------------|------|--------|-------|--------|-----------------|--------|-------|--------|-----------------|--------|
|     |                    |                | [mM] | 95% CI       | [mM]  | 95% CI | [mgO <sub>2</sub> /L] | 95% CI | [mM] | 95% CI | [mM]  | 95% CI       | [mM] | 95% CI | [mM]  | 95% CI | [mM]            | 95% CI | [mM]  | 95% CI | [mM]            | 95% CI |
| U1  | Urine              | CH male (2012) | 0.51 | 0.06         | 98.2  | 5.6    | 5063                  | 278    | 34.0 | 1.3    | 0.05  | 0.01         | 84.3 | 2.8    | 231.8 | 23.8   | 6.33            | 0.38   | 109.7 | 3.7    | 7.9             | 0.71   |
| U2  |                    |                | 0.25 |              | 49.1  |        | 2531                  |        | 17.0 |        | 0.03  |              | 42.2 |        | 123.2 | 18.1   | 3.16            |        | 54.8  |        | 3.9             |        |
| U3  |                    |                | 0.05 |              | 9.8   |        | 506                   |        | 3.4  |        | 0.01  |              | 8.4  |        | 22.7  | 0.6    | 0.63            |        | 11.0  |        | 0.8             |        |
| U4  |                    |                | 0.51 | 0.06         | 98.2  | 5.6    | 5063                  | 278    | 34.0 | 1.3    | 0.05  | 0.01         | 84.3 | 2.8    | 213.9 | 12.2   | 6.33            | 0.38   | 109.7 | 3.7    | 7.9             | 0.71   |
| U5  |                    |                | 0.51 | 0.06         | 98.2  | 5.6    | 5063                  | 278    | 34.0 | 1.3    | 0.05  | 0.01         | 84.3 | 2.8    | 254.0 | 26.3   | 6.33            | 0.38   | 109.7 | 3.7    | 7.9             | 0.71   |
| U6  |                    |                | 0.51 | 0.06         | 98.2  | 5.6    | 5063                  | 278    | 34.0 | 1.3    | 0.05  | 0.01         | 84.3 | 2.8    | 252.3 | 21.6   | 6.33            | 0.38   | 109.7 | 3.7    | 7.9             | 0.71   |
| U7  |                    |                | 0.25 |              | 49.1  |        | 2531                  |        | 17.0 |        | 0.03  |              | 42.2 |        | 119.6 | 23.0   | 3.16            |        | 54.8  |        | 3.9             |        |
| U8  |                    |                | 0.25 |              | 49.1  |        | 2531                  |        | 17.0 |        | 0.03  |              | 42.2 |        | 124.4 | 3.8    | 3.16            |        | 54.8  |        | 3.9             |        |
| U9  |                    |                | 0.15 |              | 29.5  |        | 1519                  |        | 10.2 |        | 0.02  |              | 25.3 |        | 74.3  | 11.5   | 1.90            |        | 32.9  |        | 2.4             |        |
| U10 |                    |                | 0.05 |              | 9.8   |        | 506                   |        | 3.4  |        | 0.01  |              | 8.4  |        | 22.5  | 2.4    | 0.63            |        | 11.0  |        | 0.8             |        |
| U11 |                    |                | 0.05 |              | 9.8   |        | 506                   |        | 3.4  |        | 0.01  |              | 8.4  |        | 23.9  | 0.1    | 0.63            |        | 11.0  |        | 0.8             |        |
| U12 |                    | CH male (2013) | 0.19 | 0.02         | 98.7  | 4.1    | 4085                  | 54     | 32.9 | 0.8    | <0.01 |              | 69.2 | 1.9    | 319.7 | 10.9   | 10.84           | 0.43   | 208.6 | 1.1    | 7.9             | 0.24   |
| U13 |                    | CH male (2014) | 0.18 | 0.01         | 89.8  | 3.1    | 3635                  | 212    | 30.0 | 1.3    | <0.01 |              | 63.6 | 1.8    | 378.2 | 18.4   | 0.78            | 0.02   | 283.4 | 68.9   | 8.2             | 0.22   |
| U14 |                    | CH female      | 0.25 | 0.01         | 37.1  | 19.3   | 367                   | 64     | 13.4 | 0.6    | 0.02  | 0.00         | 24.8 | 0.8    | 160.0 | 19.3   | 0.28            | 0.01   | 263.8 | 154.1  | 3.5             | 0.17   |
| U15 |                    | SA mix         | 0.21 | 0.02         | 118.7 | 3.3    | 2004                  | 50     | 21.1 | 0.6    | 0.05  | 0.06         | 99.9 | 1.8    | 434.7 | 9.8    | 11.67           | 1.85   | 213.6 | 7.9    | 10.6            | 0.20   |
| S1  | Sludge             | CH Synthetic   | 1.06 | 0.95         | 4.8   | 3.3    | 2782                  | 789    | 4.0  | 1.2    | 0.38  | 0.37         | 8.2  | 2.8    | 245.3 | 144.8  | 0.17            | 0.05   | 171.1 | 120.4  | 0.2             | 0.04   |
| S2  |                    | CH Septic tank | 0.89 | 0.74         | 3.8   | 1.1    | 438                   | 115    | 1.4  | 0.2    | 0.48  | 0.40         | 2.8  | 0.4    | 27.8  | 11.1   | 2.10            | 0.08   | 39.6  | 5.6    | 0.1             | 0.10   |
| S3  |                    | CH Synthetic   | 0.37 | 1.32         | 17.8  | 0.6    | 2191                  | 1429   | 25.7 | 1.0    | 0.41  | 1.58         | 2.0  | 0.1    | 10.9  | 4.3    | 1.60            | 0.90   | 9.4   | 7.8    | 0.4             | 0.00   |
| M1  | Manure             | CH Pig         | 1.66 | 12.97        | 19.9  | 0.2    | 9816                  | 5136   | 20.1 | 0.2    | 1.29  | 0.01         | 11.4 | 0.1    | 196.4 | 7.6    | 0.30            | 0.30   | 64.4  | 38.5   | 0.9             | 0.10   |
| M2  |                    | CH             | 1.38 | 1.91         | 15.5  | 0.3    | 4527                  | 2543   | 15.8 | 0.2    | 1.70  | 1.02         | 9.2  | 0.1    | 99.1  | 6.6    | 0.44            | 0.24   | 68.1  | 22.8   | 0.4             | 0.09   |
| M3  |                    | CH Cow         | 1.10 | <sup>a</sup> | 22.2  | 0.3    | 6394                  | 425    | 39.9 | 1.6    | 4.15  | <sup>a</sup> | 10.5 | 0.4    | 505.3 | 6.0    | 0.23            | 0.19   | 96.1  | 5.4    | 0.8             | 0.10   |
| M4  |                    | CH             | 2.18 | 10.68        | 17.3  | 0.1    | 3100                  | 1196   | 30.3 | 3.0    | 3.42  | 2.32         | 8.5  | 0.9    | 121.5 | 7.7    | 0.56            | 0.44   | 84.8  | 16.1   | 0.0             |        |

<sup>a</sup> Only one measurement

Table S2: Measured ( $k_{obs}$ ) and predicted ( $k_{pred}$ ) inactivation rate constants.

| Virus   | $k_{obs}$            |        |                | $k_{pred}$           |                      |                      |                      |                      |                      |                      |       |
|---------|----------------------|--------|----------------|----------------------|----------------------|----------------------|----------------------|----------------------|----------------------|----------------------|-------|
|         | [day <sup>-1</sup> ] | IC 95% | R <sup>2</sup> | T sensitivity        |                      | pH sensitivity       |                      | Ions measured        |                      |                      |       |
|         |                      |        |                | -1°C                 | +1°C                 | -0.1                 | +0.1                 | only TIC & NH4       | Only NH4             |                      |       |
|         |                      |        |                | [day <sup>-1</sup> ] | [day <sup>-1</sup> ] | [day <sup>-1</sup> ] | [day <sup>-1</sup> ] | [day <sup>-1</sup> ] | [day <sup>-1</sup> ] | [day <sup>-1</sup> ] |       |
| MS2     | U1                   | 0.89   | 0.06           | 0.995                | 0.95                 | 0.84                 | 1.07                 | 0.79                 | 1.14                 | 0.94                 | 0.78  |
|         | U2                   | 0.56   | 0.02           | 0.998                | 0.59                 | 0.52                 | 0.67                 | 0.49                 | 0.71                 | 0.58                 | 0.49  |
|         | U3                   | 0.35   | 0.02           | 0.998                | 0.16                 | 0.14                 | 0.18                 | 0.13                 | 0.19                 | 0.15                 | 0.13  |
|         | U4                   | 3.09   | 0.25           | 0.990                | 2.85                 | 2.55                 | 3.17                 | 2.41                 | 3.38                 | 2.83                 | 2.40  |
|         | U5                   | 2.93   | 0.10           | 0.998                | 3.44                 | 3.08                 | 3.84                 | 2.89                 | 4.11                 | 3.42                 | 3.02  |
|         | U6                   | 2.95   | 0.20           | 0.997                | 3.43                 | 3.07                 | 3.82                 | 2.87                 | 4.09                 | 3.41                 | 3.00  |
|         | U7                   | 2.15   | 0.11           | 0.995                | 2.02                 | 1.81                 | 2.25                 | 1.69                 | 2.40                 | 1.99                 | 1.71  |
|         | U8                   | 2.12   | 0.15           | 0.997                | 1.83                 | 1.64                 | 2.04                 | 1.53                 | 2.18                 | 1.80                 | 1.53  |
|         | U9                   | 1.61   | 0.10           | 0.991                | 1.31                 | 1.18                 | 1.46                 | 1.10                 | 1.57                 | 1.29                 | 1.10  |
|         | U10                  | 1.35   | 0.14           | 0.984                | 0.50                 | 0.45                 | 0.56                 | 0.42                 | 0.60                 | 0.49                 | 0.41  |
|         | U11                  | 1.37   | 0.24           | 0.982                | 0.52                 | 0.46                 | 0.58                 | 0.43                 | 0.62                 | 0.51                 | 0.43  |
|         | U12                  | 11.76  | 0.38           | 0.999                | 10.80                | 9.72                 | 11.90                | 9.19                 | 11.80                | 10.50                | 10.00 |
|         | U13                  | 11.14  | 1.15           | 0.989                | 14.20                | 12.80                | 15.60                | 12.20                | 16.40                | 13.40                | 13.00 |
|         | U14                  | 3.78   | 0.45           | 0.978                | 5.25                 | 4.75                 | 5.80                 | 4.55                 | 6.06                 | 4.65                 | 3.70  |
|         | U15                  | 6.82   | 0.46           | 0.991                | 9.26                 | 8.31                 | 10.30                | 7.77                 | 11.00                | 8.88                 | 8.51  |
|         | S1                   | 4.12   | <sup>a</sup>   |                      | 4.32                 | 3.88                 | 4.80                 | 3.67                 | 5.08                 | 3.83                 | 3.25  |
|         | S2                   | 0.63   | 0.19           | 0.995                | 0.49                 | 0.44                 | 0.54                 | 0.44                 | 0.55                 | 0.45                 | 0.21  |
|         | S3                   | 0.51   | 0.06           | 0.997                | 0.11                 | 0.10                 | 0.12                 | 0.10                 | 0.13                 | 0.11                 | 0.05  |
|         | M1                   | 1.35   | 0.35           | 0.986                | 1.31                 | 1.18                 | 1.46                 | 1.11                 | 1.55                 | 1.32                 | 1.03  |
|         | M2                   | 3.60   | 0.57           | 0.999                | 1.48                 | 1.33                 | 1.64                 | 1.26                 | 1.74                 | 1.44                 | 1.10  |
| M3      | 6.79                 | 5.35   | 0.967          | 4.39                 | 3.92                 | 4.91                 | 3.62                 | 5.32                 | 4.35                 | 4.07                 |       |
| M4      | 2.69                 | 0.81   | 0.983          | 2.31                 | 2.08                 | 2.57                 | 1.96                 | 2.72                 | 2.18                 | 1.77                 |       |
| HAdV    | U4                   | 0.89   | 0.12           | 0.982                |                      |                      |                      |                      |                      |                      |       |
|         | U12                  | 9.89   | 1.14           | 0.973                |                      |                      |                      |                      |                      |                      |       |
|         | S2                   | 1.05   | 0.28           | 0.884                |                      |                      |                      |                      |                      |                      |       |
| M4      | 0.28                 | 0.07   | 0.939          |                      |                      |                      |                      |                      |                      |                      |       |
| T4      | U12                  | 0.08   | 0.01           | 0.964                |                      |                      |                      |                      |                      |                      |       |
|         | S2                   | 0.04   | 0.03           | 0.941                |                      |                      |                      |                      |                      |                      |       |
|         | M4                   | 0.23   | 0.05           | 0.997                | (fast)               |                      |                      |                      |                      |                      |       |
|         |                      | 0.03   | 0.00           | 0.999                | (slow)               |                      |                      |                      |                      |                      |       |
| PhiX174 | U12                  | 0.14   | 0.02           | 0.957                |                      |                      |                      |                      |                      |                      |       |
|         | S2                   | 0.39   | 0.00           | 1.000                |                      |                      |                      |                      |                      |                      |       |
|         | M4                   | 0.39   | 0.20           | 0.986                | (fast)               |                      |                      |                      |                      |                      |       |
|         |                      | 0.05   | 0.03           | 0.941                | (slow)               |                      |                      |                      |                      |                      |       |

<sup>a</sup>  $k_{obs}$  determined with two data points only

**Table S3: Solution composition and predicted inactivation rate constants for sludge and manure at the beginning and end of the kinetic experiments.**

| Sample ID    |                         | Sludge S2 |          |         |          | S3      |          |              |          | Manure M1 |          |              |          | M2           |          |              |          | M3           |          |        |          |              |  |
|--------------|-------------------------|-----------|----------|---------|----------|---------|----------|--------------|----------|-----------|----------|--------------|----------|--------------|----------|--------------|----------|--------------|----------|--------|----------|--------------|--|
|              |                         | initial   |          | final   |          | initial |          | final        |          | initial   |          | final        |          | initial      |          | final        |          | initial      |          | final  |          |              |  |
|              |                         | 0 day     |          | 14 days |          | 0 day   |          | 21 days      |          | 0 day     |          | 10 days      |          | 0 day        |          | 4 days       |          | 0 day        |          | 2 days |          |              |  |
|              |                         | Avg.      | std      | Avg.    | std      | Avg.    | std      | Avg.         | std      | Avg.      | std      | Avg.         | std      | Avg.         | std      | Avg.         | std      | Avg.         | std      | Avg.   | std      |              |  |
| Measured     | TIC                     | [mM]      | 35.20    | 3.19    | 43.99    | 1.68    | 5.42     | 0.10         | 13.31    | 9.64      | 36.62    | 0.38         | 92.14    | 32.45        | 49.46    | 1.56         | 86.67    | 11.97        | 97.29    | 2.79   | 94.81    | 7.41         |  |
|              | TAN                     | [mM]      | 18.57    | 0.79    | 37.04    | 4.67    | 13.94    | 1.24         | 7.87     | 3.56      | 198.71   | 4.08         | 194.04   | 9.97         | 95.35    | 4.65         | 102.79   | 5.94         | 508.32   | 6.65   | 502.38   | 3.38         |  |
|              | Cl                      | [mM]      | 2.88     | 0.22    | 4.71     | 0.20    | 17.45    | 0.21         | 18.20    | 0.58      | 20.13    | 0.25         | 19.86    | 0.13         | 15.59    | 0.15         | 15.34    | 0.35         | 22.02    | 0.25   | 22.43    | 0.21         |  |
|              | SO4                     | [mM]      | 0.19     | 0.02    | 0.04     | 0.01    | 0.35     | 0.00         | 0.44     | 0.02      | 0.85     | 0.02         | 1.03     | 0.13         | 0.32     | 0.02         | 0.45     | 0.07         | 0.84     | 0.09   | 0.85     | 0.15         |  |
|              | PO4                     | [mM]      | 2.08     | 0.12    | 2.11     | 0.03    | 0.91     | 0.02         | 2.39     | 0.08      | 0.52     | 0.25         | 0.16     | 0.02         | 0.63     | 0.10         | 0.26     | 0.15         | 0.14     | 0.04   | 0.32     | 0.24         |  |
|              | Ca                      | [mM]      | 1.51     | 0.28    | 0.28     | 0.14    | 0.99     | <sup>a</sup> | 0.07     | 0.04      | 2.50     | <sup>a</sup> | 0.84     | <sup>a</sup> | 1.54     | <sup>a</sup> | 1.23     | <sup>a</sup> | <0.01    |        | 1.11     | <sup>a</sup> |  |
|              | Mg                      | [mM]      | 0.81     | 0.15    | 0.15     | 0.08    | 1.15     | <sup>a</sup> | 0.04     | 0.03      | 1.29     | <sup>a</sup> | 1.29     | <sup>a</sup> | 1.62     | <sup>a</sup> | 1.78     | <sup>a</sup> | <0.01    |        | 4.15     | <sup>a</sup> |  |
|              | Na                      | [mM]      | 2.47     | 0.06    | 3.15     | 0.05    | 2.01     | 0.02         | 1.89     | 0.00      | 11.44    | 0.10         | 11.35    | 0.12         | 9.14     | 0.14         | 9.17     | 0.09         | 10.39    | 0.43   | 10.75    | 0.04         |  |
|              | K                       | [mM]      | 1.22     | 0.01    | 1.60     | 0.01    | 26.58    | 0.04         | 24.78    | 0.12      | 20.18    | 0.12         | 20.07    | 0.27         | 15.80    | 0.23         | 15.71    | 0.20         | 39.29    | 1.78   | 40.81    | 0.31         |  |
|              | SCOD                    | [mgO2/L]  | 500.00   | 11.31   | 375.80   | 9.90    | 1404.15  | 28.36        | 2958.02  | 261.09    | 11658.86 | 1146.74      | 7973.81  | 4044.89      | 6735.84  | 163.22       | 2318.21  | 150.48       | 6560.65  | 319.16 | 6227.57  | 40.66        |  |
|              | pH                      | [-]       | 7.78     | 0.07    | 7.74     | 0.05    | 7.42     | 0.03         | 7.36     | 0.20      | 7.58     | 0.00         | 8.00     | 0.20         | 8.13     | 0.05         | 8.05     | 0.08         | 8.02     | 0.00   | 8.08     | 0.01         |  |
|              | Calculated with PHREEQC | NH3       | [mM]     | 0.94    |          | 1.70    |          | 0.32         |          | 0.148     |          | 5.29         |          | 13.1         |          | 8.86         |          | 8.38         |          | 33.8   |          | 37.8         |  |
|              |                         | CO3       | [mM]     | 0.08    |          | 0.10    |          | 0.00544      |          | 0.0107    |          | 0.0439       |          | 0.299        |          | 0.223        |          | 0.348        |          | 0.293  |          | 0.324        |  |
| HCO3         |                         | [mM]      | 25.70    |         | 32.00    |         | 3.79     |              | 8.53     |           | 21.1     |              | 54.8     |              | 30.3     |              | 56.9     |              | 51.2     |        | 49.3     |              |  |
| OH           |                         | [mM]      | 0.00124  |         | 0.00113  |         | 0.000539 |              | 0.000469 |           | 0.000774 |              | 0.00204  |              | 0.00275  |              | 0.00229  |              | 0.00211  |        | 0.00243  |              |  |
| PO4          |                         | [mM]      | 1.78E-05 |         | 1.62E-05 |         | 3.04E-06 |              | 6.89E-06 |           | 9.06E-07 |              | 8.19E-07 |              | 6.07E-06 |              | 2.22E-06 |              | 3.45E-07 |        | 8.65E-07 |              |  |
| HPO4         |                         | [mM]      | 0.54     |         | 0.54     |         | 0.211    |              | 0.55     |           | 0.0436   |              | 0.015    |              | 0.0822   |              | 0.0362   |              | 0.00603  |        | 0.0132   |              |  |
| $k_{pred}^b$ | [day <sup>-1</sup> ]    | 0.42      |          | 0.551   |          | 0.0988  |          | 0.126        |          | 0.79      |          | 2.05         |          | 1.41         |          | 1.6          |          | 4.18         |          | 4.62   |          |              |  |

<sup>a</sup> Only one measurement

<sup>b</sup> Calculated with the model described in section 3.2

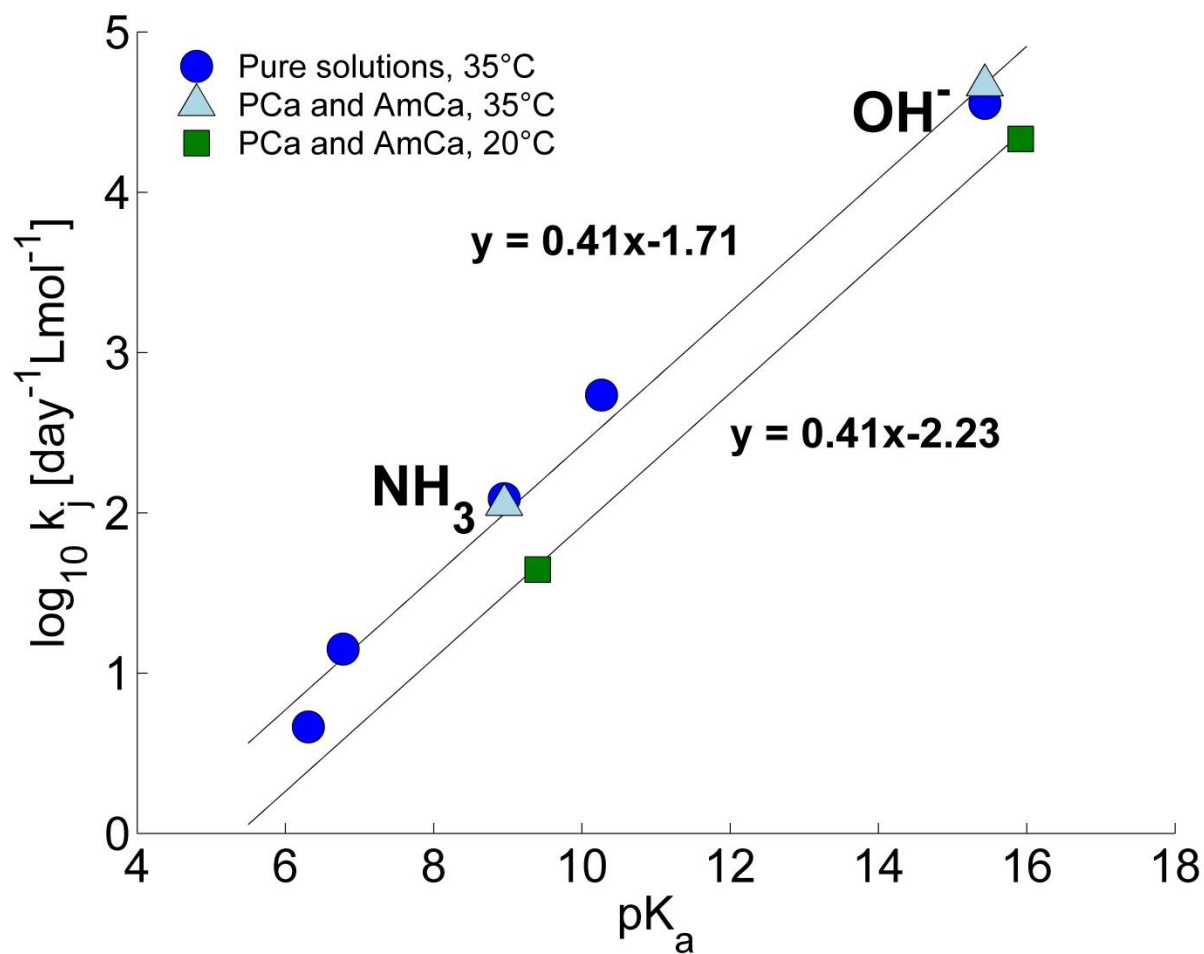

Figure S1: Bronsted plot of the pK<sub>a</sub> of various bases versus their second-order rate constant for inactivation of MS2. k<sub>j</sub> was determined, according to eq. 4, in aqueous solutions of the pure base solution at 35°C (circle) and in phosphate-carbonate (PCa) and ammonium-carbonate (AmCa) buffer solutions for bases OH<sup>-</sup> and NH<sub>3</sub> respectively at 35°C (triangle) and 20°C (square). All data are derived from Decrey et al.<sup>1</sup>. pK<sub>a</sub> values were corrected for temperature (see above, determination of pK<sub>a</sub>).

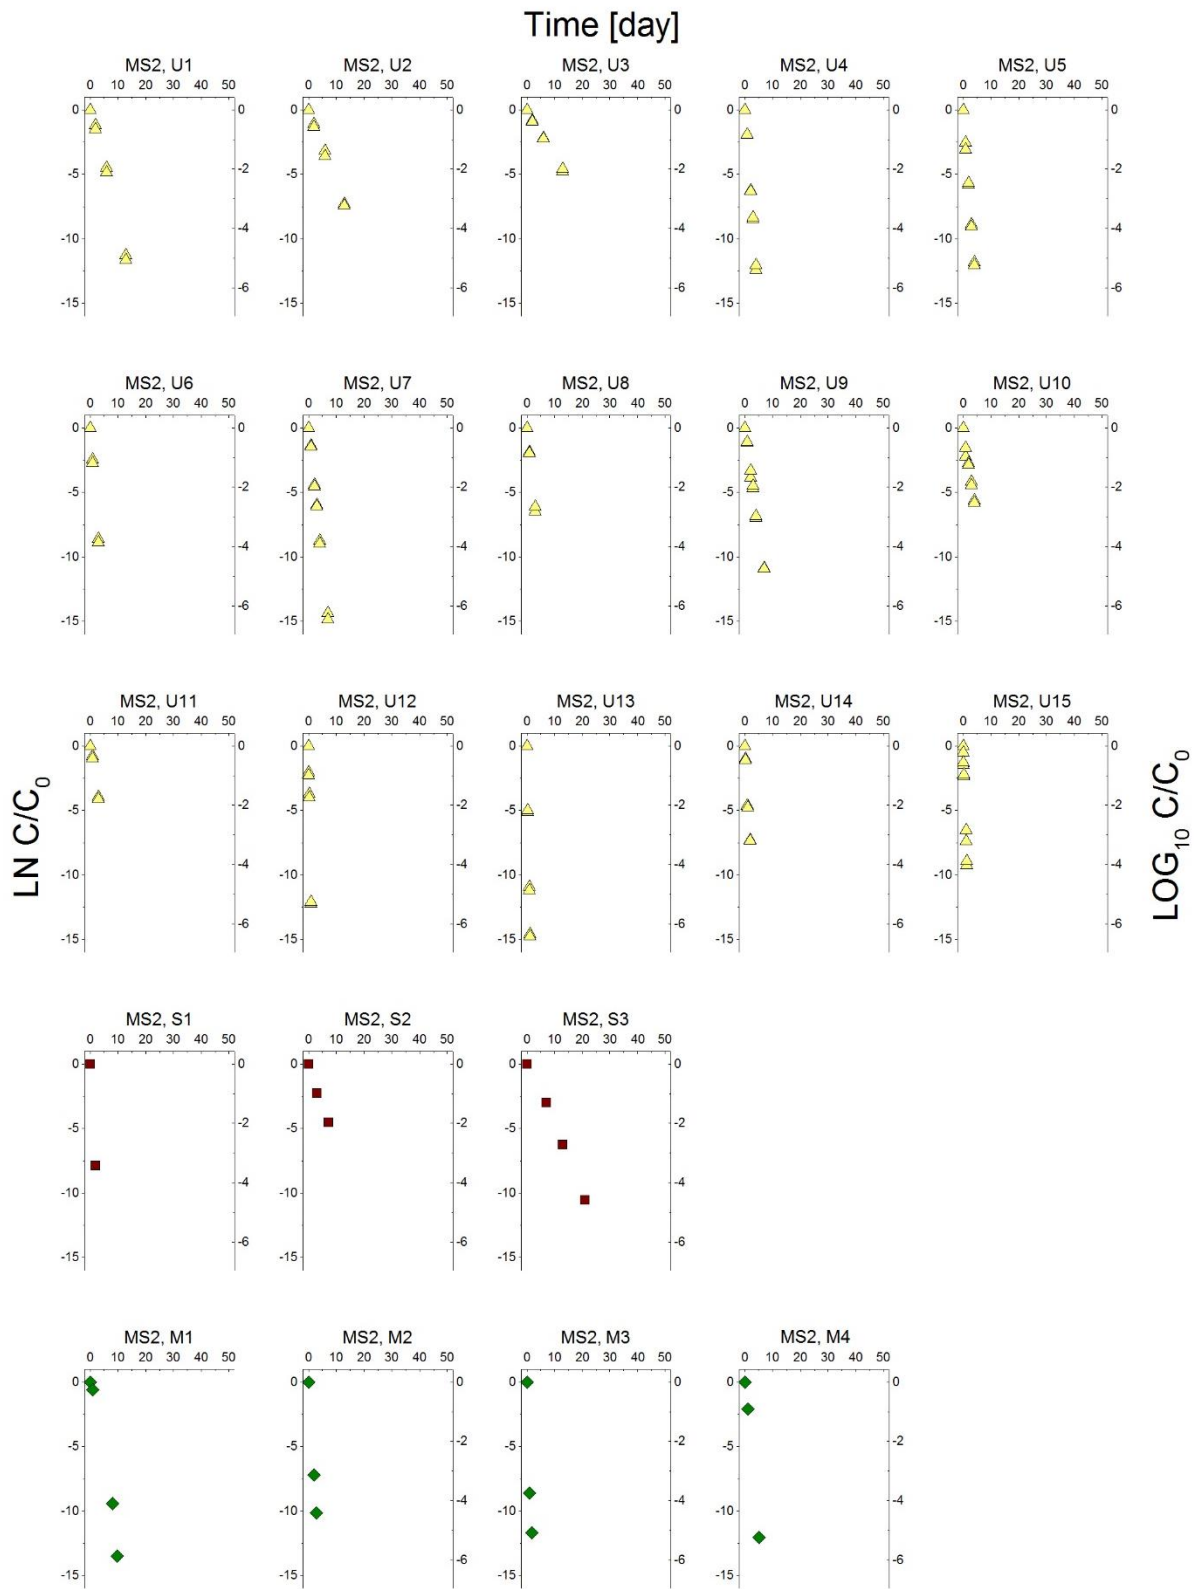

Figure S2: kinetics of MS2 inactivation in stored urine (U1-U15), sludge (S1-S3) and manure (M1-M4).



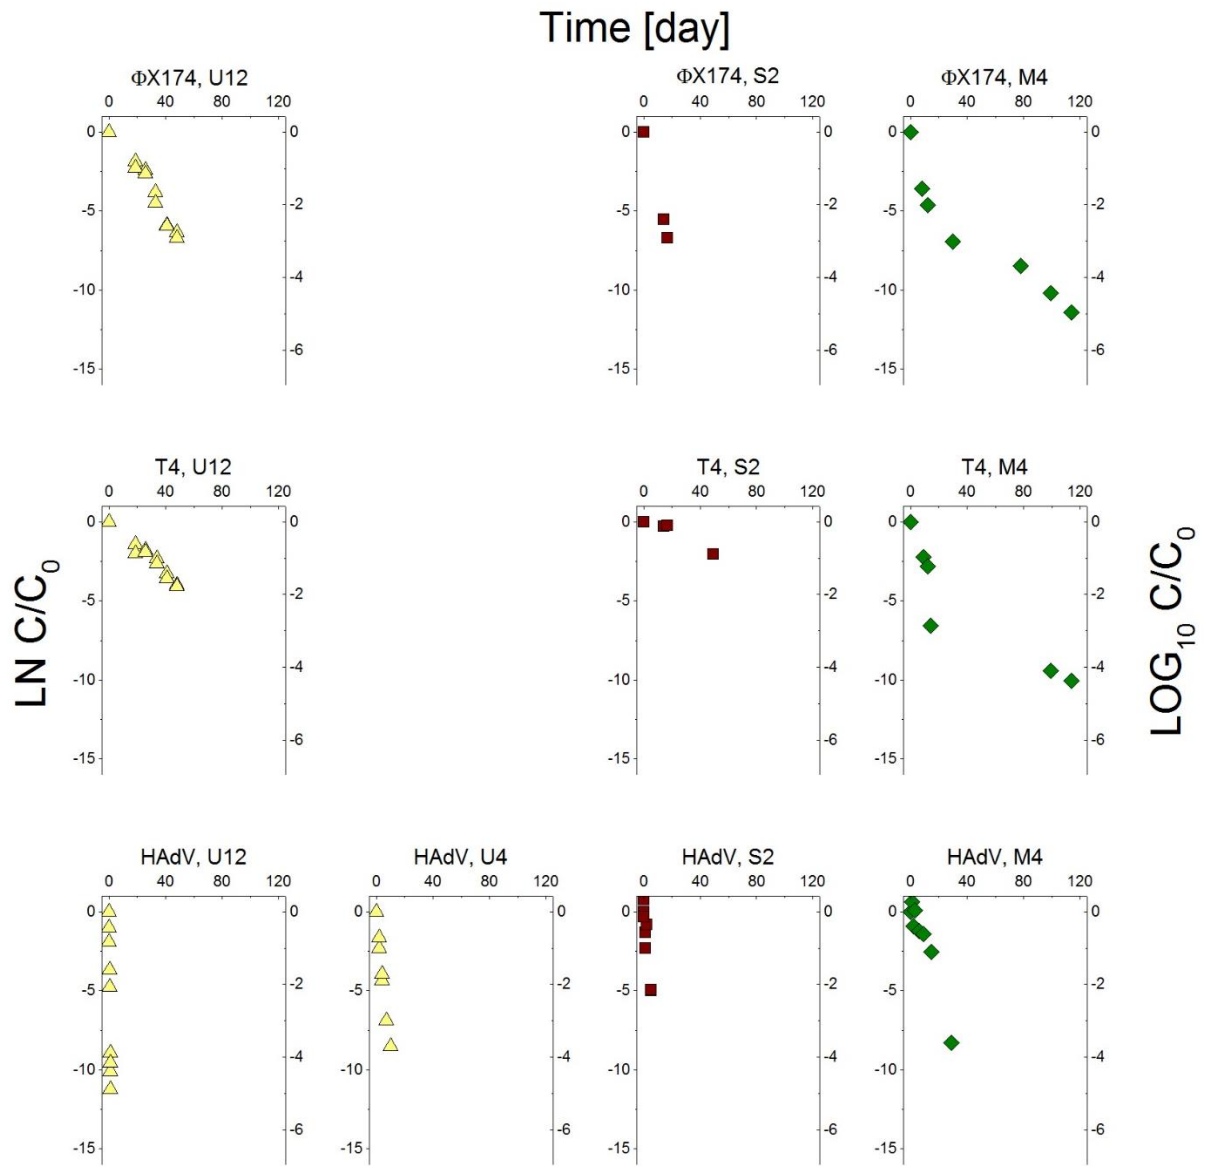

Figure S3: kinetics of  $\Phi X174$ ,  $T4$  and  $HAdV$  inactivation in stored urine (U4, U12), sludge (S2) and manure (M4).

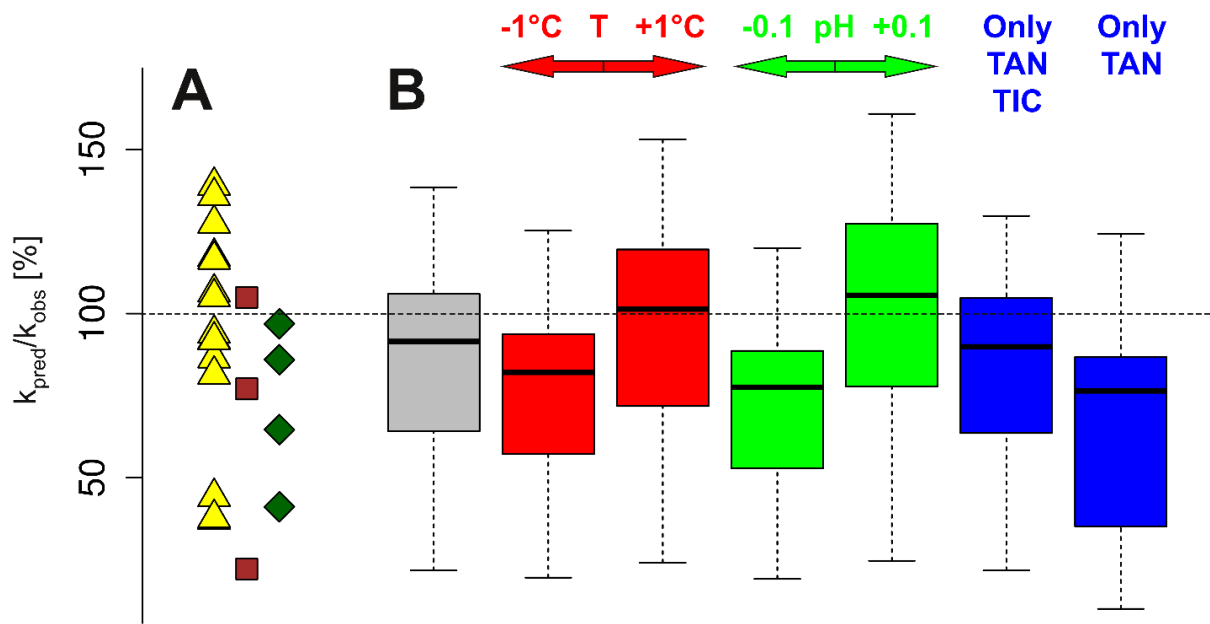

Figure S4: A. Accuracy of the predicted MS2 inactivation rate constant in stored urine (yellow triangles), sludge (brown squares) and manure (green diamonds). B. Sensitivity of the MS2 model prediction to temperature change (red), pH change (green) and TIC and TAN concentrations (blue) in stored urine, sludge and manure. The prediction corresponding to the measured properties of stored urine, sludge and manure (Tables 1 and S1) is represented in grey. Data are shown in boxplot format, where the thick line indicates the median, the box is bounded by the first and third quartiles (50% of the data) and the whiskers indicates the minimum and maximum of the ratio  $k_{\text{pred}}/k_{\text{obs}}$  (in percentage) determined for all 22 samples tested.

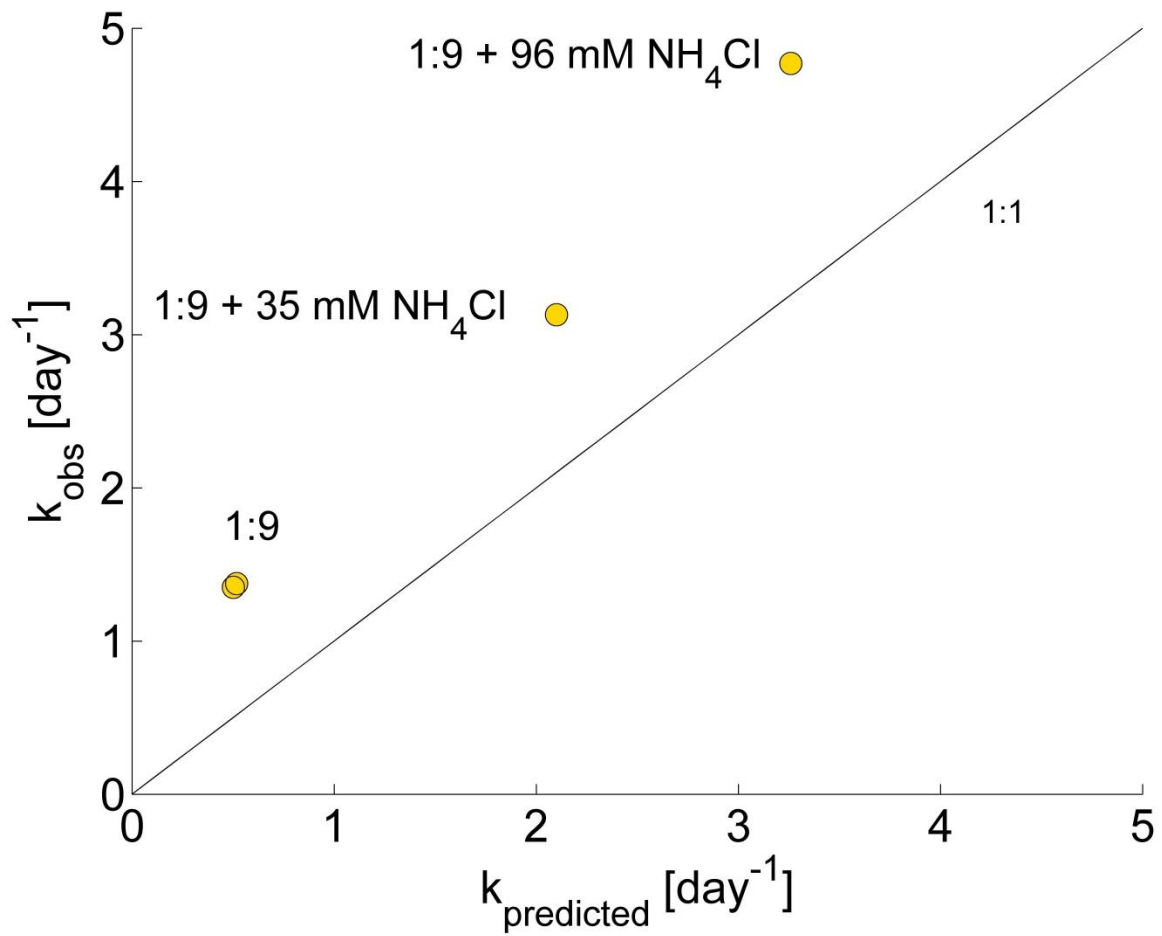

Figure S5: Comparison of measured and predicted inactivation rate constants for MS2 at 35°C in 1:9 diluted urine without  $\text{NH}_4\text{Cl}$  addition, and with 35 and 96  $\text{mmol L}^{-1}$   $\text{NH}_4\text{Cl}$ . NaOH (9.8 and 22.1  $\text{mmol L}^{-1}$ ) was added with  $\text{NH}_4\text{Cl}$  to partly compensate for pH drop. Final pH values are: 8.13, 8.52 and 8.46 from lowest to highest ammonia content. The solid line represents the 1:1 ratio between measurement and prediction.

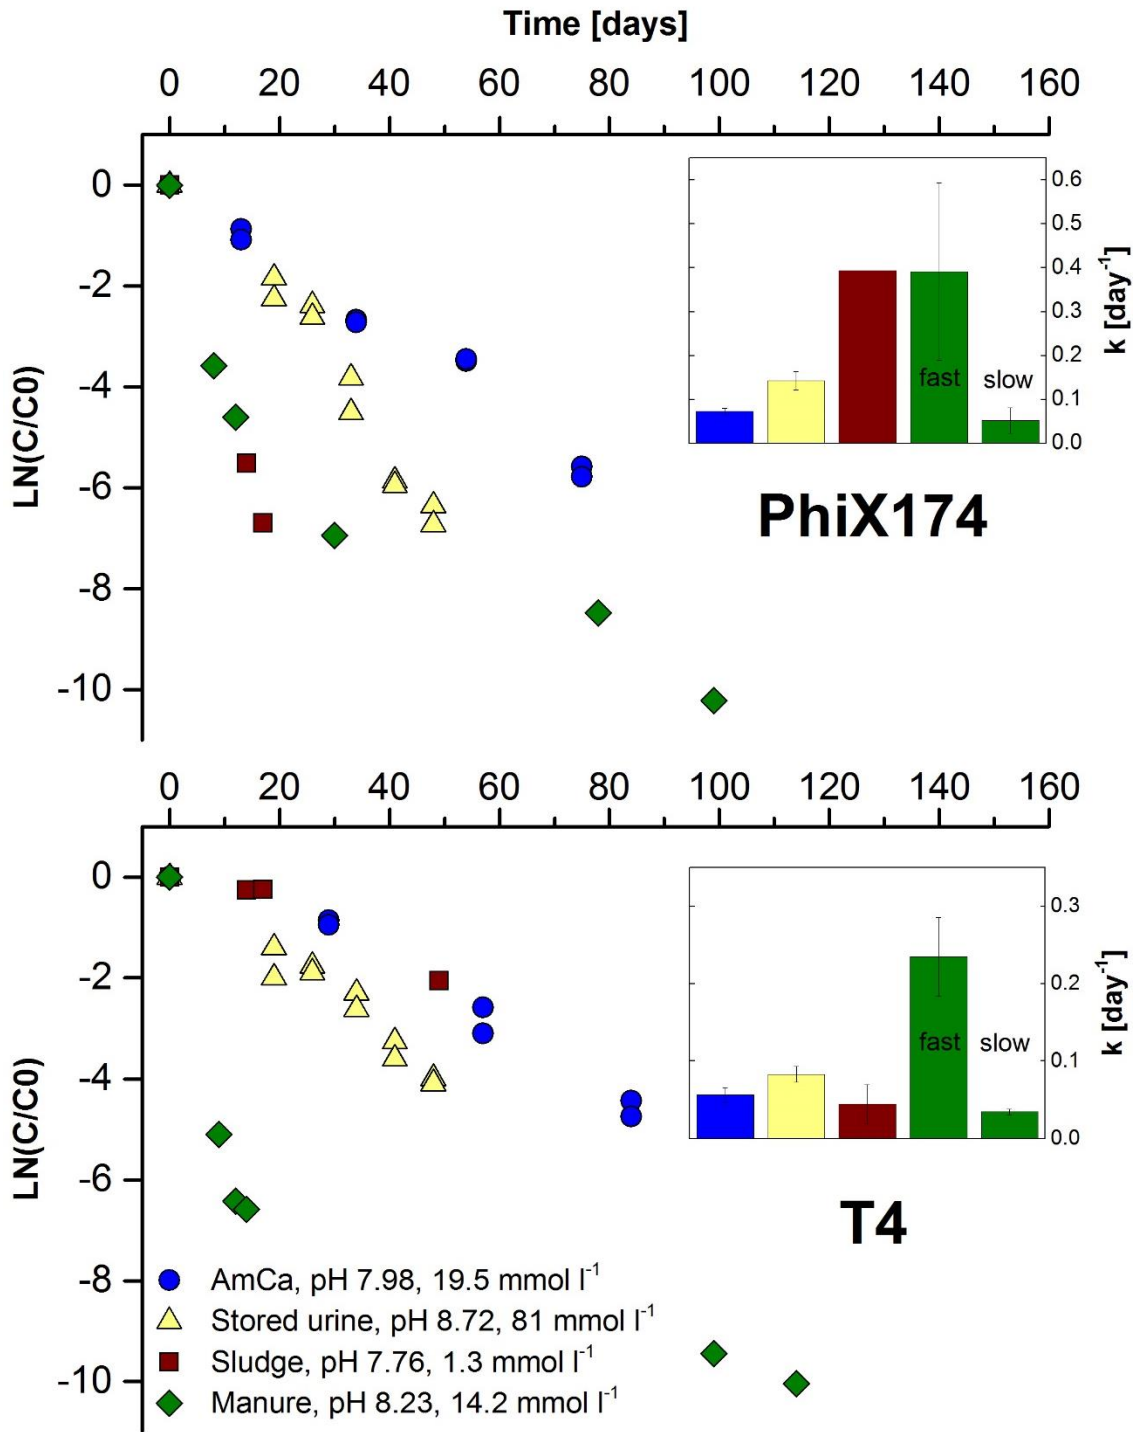

Figure S6: detailed kinetics of  $\Phi$ X174 and T4 inactivation in buffer solution (data from Decrey et al.<sup>2</sup>), stored urine (U12), sludge (S2) and manure (M4). The insets summarize the inactivation rate constants for the initial fast and late slow phase of the inactivation curves in manure. pH and  $\text{NH}_3$  activities of the different solutions are described in the legend.

## References

- 1 L. Decrey, S. Kazama, K. M. Udert and T. Kohn, *Environ. Sci. Technol.*, 2015, **49**, 1060–1067.
- 2 L. Decrey, S. Kazama and T. Kohn, *Appl. Environ. Microbiol.*, 2016, **82**, 4909–20.
